# Supplementary material
Source: Springer Nature journal article supplement (https://www.springermedizin.de/resource/supplementary/13075_2009_2773_MOESM2_ESM.pdf/9692856)
Supplement: MOESM2 [file 9692856]

165 potentially relevant references  
Identified

156 references  
excluded by title and  
abstract reviews

9 full text articles retrieved for  
detailed evaluation

2 systematic reviews  
excluded

7 references in the meta-analysis:  
3 cohort, 3 case-control and 1 self-  
controlled case series
